# Supplementary material
Source: Royal Society of Chemistry journal article supplement (doi:10.1039/d6nr00547k)
Supplement: d6nr00547k1.pdf [file d6nr00547k1.pdf]

*Supporting information*

**Ultrasound-driven triphasic contact-electro-catalytic CO<sub>2</sub> reduction  
to methanol**

Youlin Zhang<sup>a,b</sup>, Wenpeng Wang<sup>c</sup>, Kunpeng, Li<sup>a,d</sup>, Haoyu Deng<sup>a,b</sup>, Liucheng Wang<sup>a,b</sup>,  
Nannan Wang<sup>a,c\*</sup>, Daoai Wang<sup>a\*</sup>

*<sup>a</sup> State Key Laboratory of Solid Lubrication, Lanzhou Institute of Chemical Physics,  
Chinese Academy of Sciences, Lanzhou 730000, China.*

*<sup>b</sup> Center of Materials Science and Optoelectronics Engineering, University of Chinese  
Academy of Sciences, Beijing 100049, China.*

*<sup>c</sup> Shandong Laboratory of Yantai Advanced Materials and Green Manufacturing,  
Yantai 265503, China.*

*<sup>d</sup> Qingdao Center of Resource Chemistry and New Materials, Qingdao 266104, China.*

\*Corresponding author: wangnannan@licp.cas.cn; wangda@licp.cas.cn

## Supplementary Figures

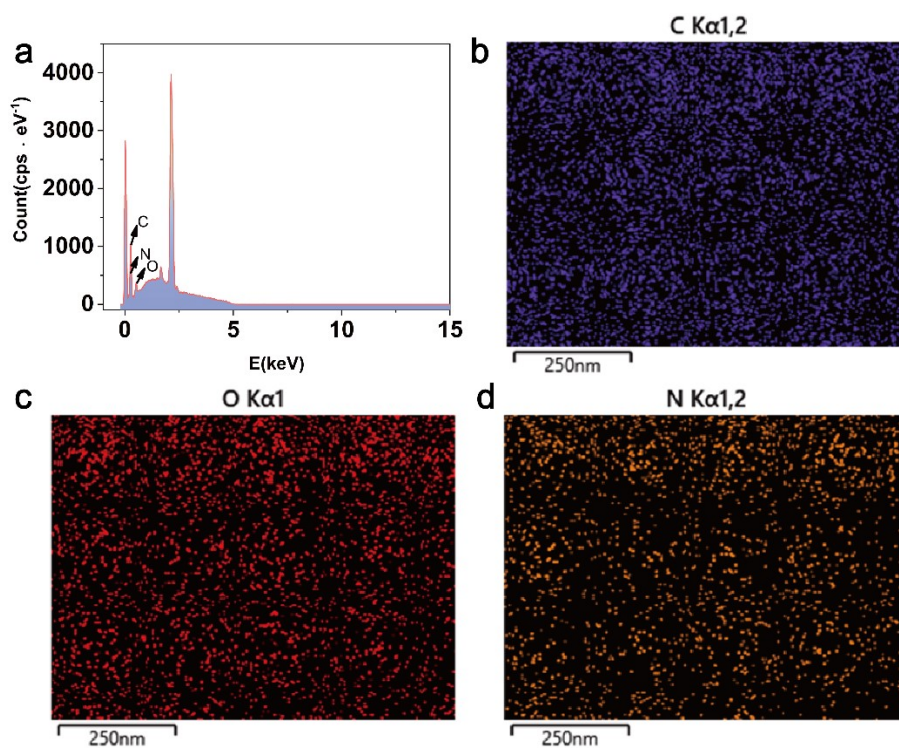

**Figure S1.** (a) EDS spectrum of PI aerogel under high-magnification microscopy (130,000 $\times$ ) and elemental distribution maps of C (b), O (c) and N (d).

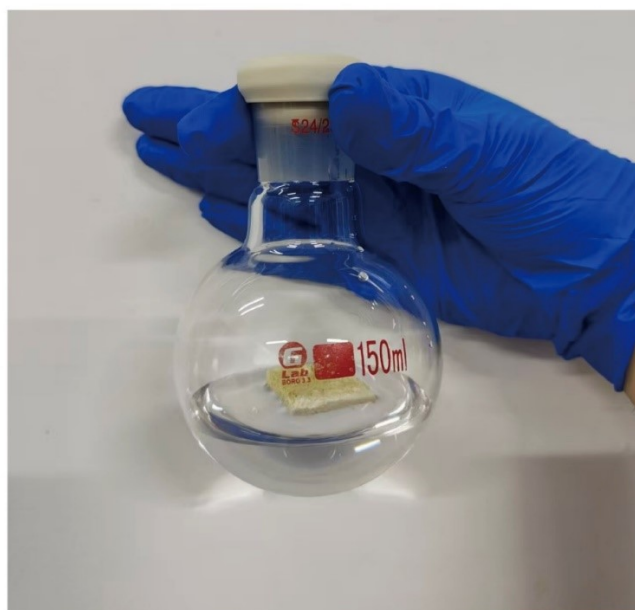

**Figure S2.** Photograph of holding the reaction vessel.

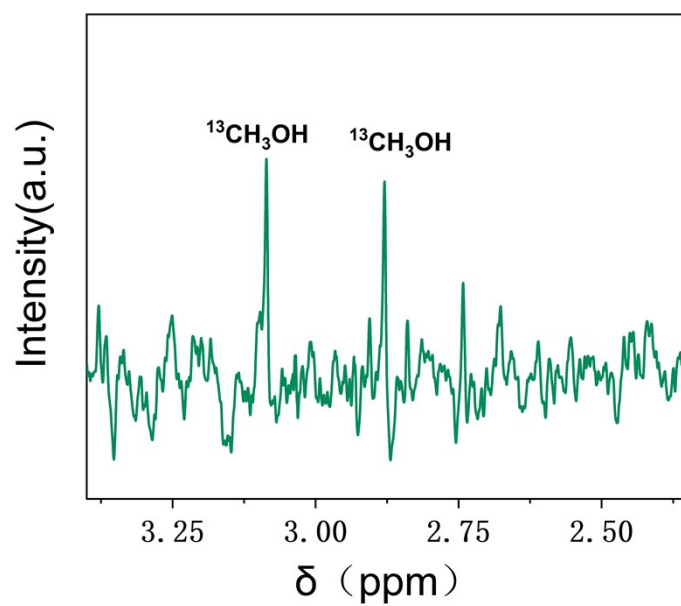

**Figure S3.**  $^1\text{H}$ -NMR methanol peak obtained from experiments using  $^{13}\text{C}$ -labeled  $\text{CO}_2$

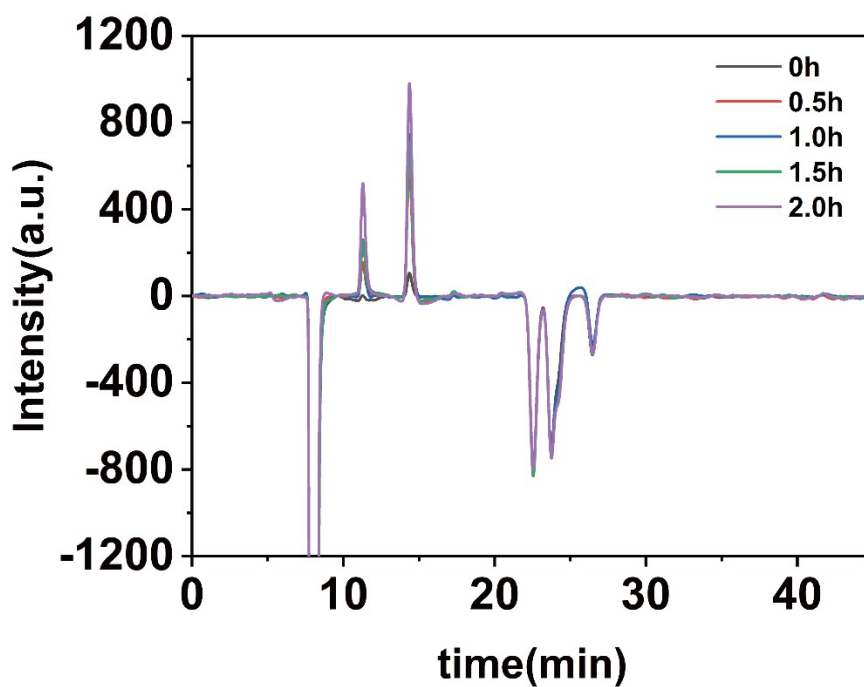

**Figure S4.** High-Resolution High-Performance Liquid Chromatography (HR-HPLC) of post-reaction liquid at 0-2 h.

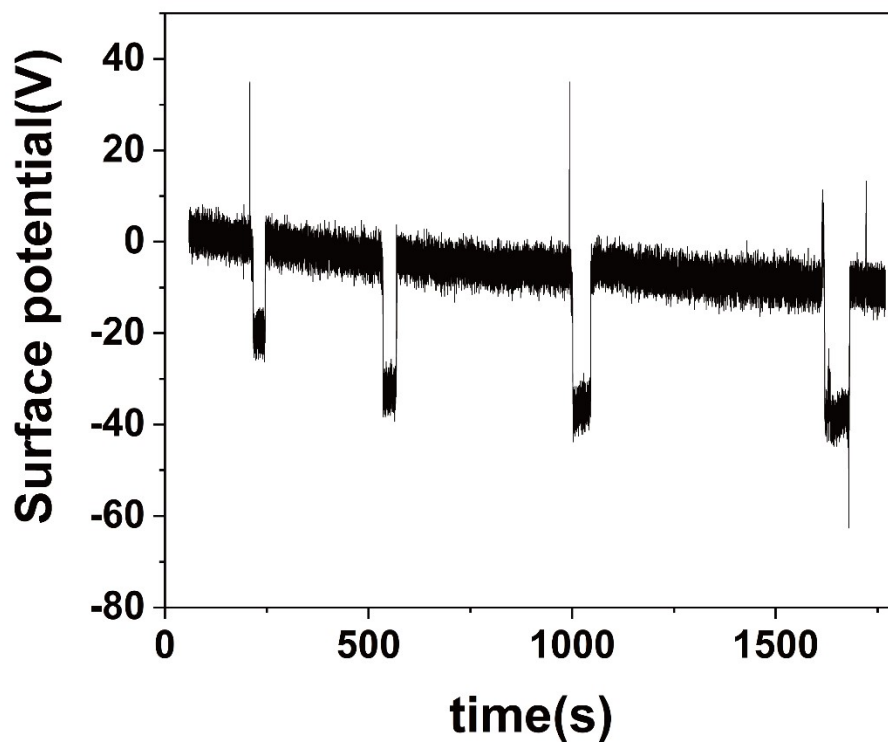

**Figure S5.** Graph of PI aerogel surface potential variation with ultrasound time

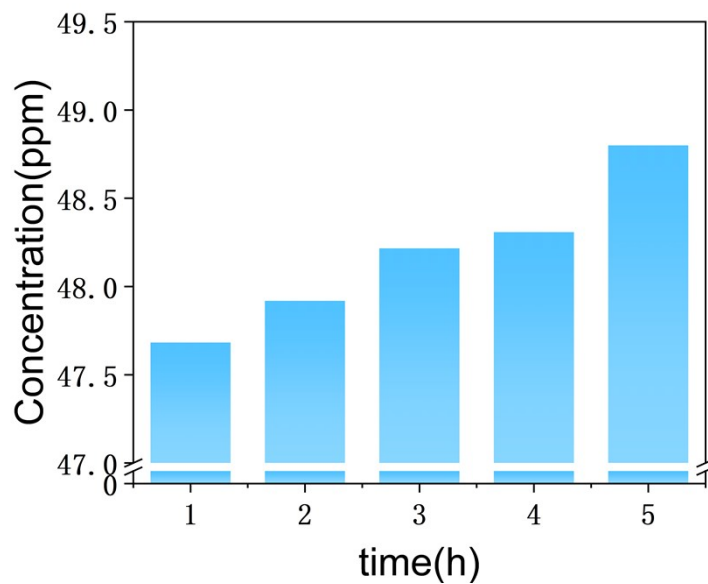

**Figure S6.** Bar chart of methanol concentration determined by HPLC using polyimide aerogel under 5h ultrasonication.

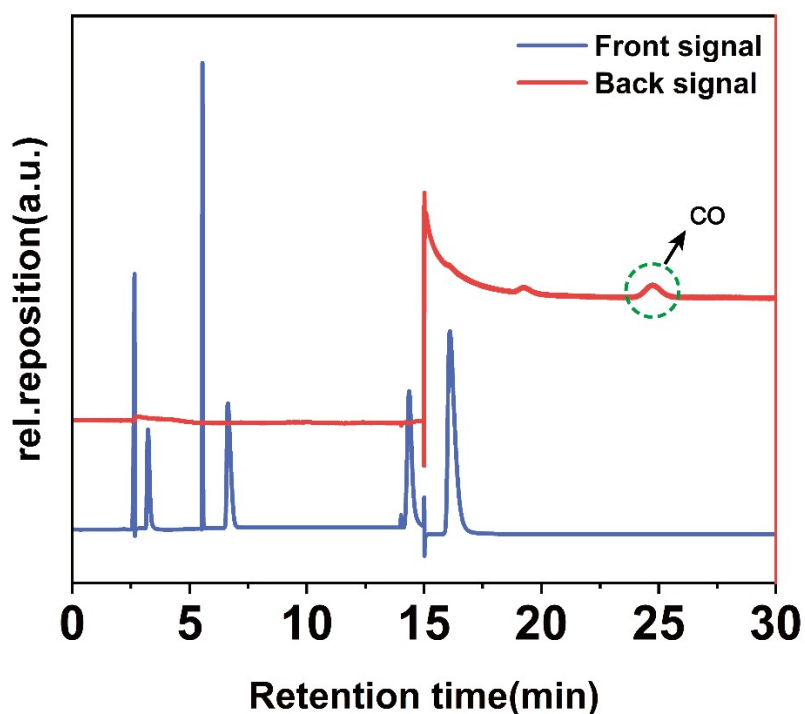

**Figure S7.** Gas chromatography dual - channel detection chromatogram of gases after 2 hours of reaction.

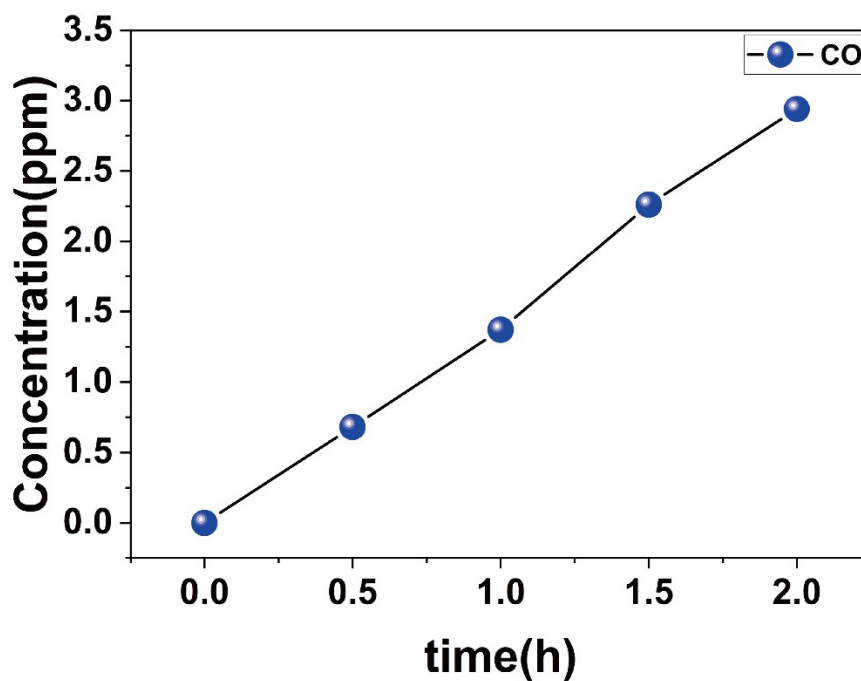

**Figure S8.** Temporal evolution of carbon monoxide concentration measured by gas chromatography

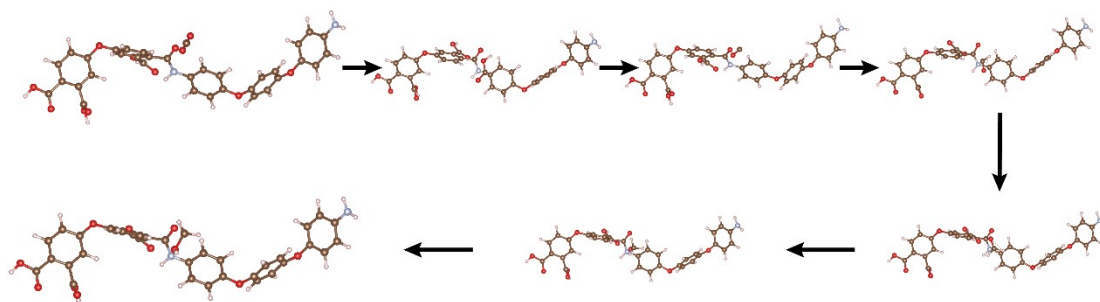

**Figure S9.** Molecular conformation evolution diagram of polyimide obtained by DFT calculations.

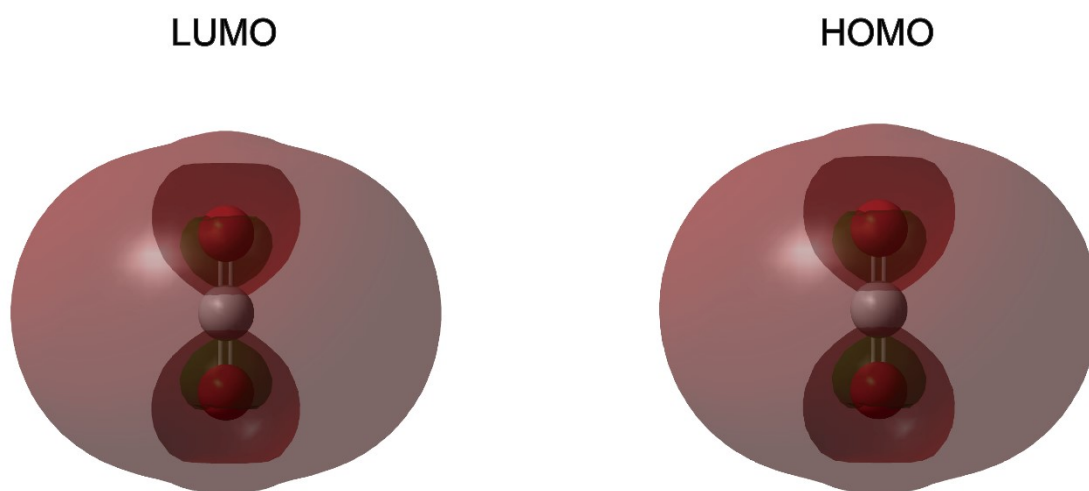

**Figure S10.** Orbital diagram of LUMO and HOMO for the carbon dioxide molecule obtained by DFT calculations.

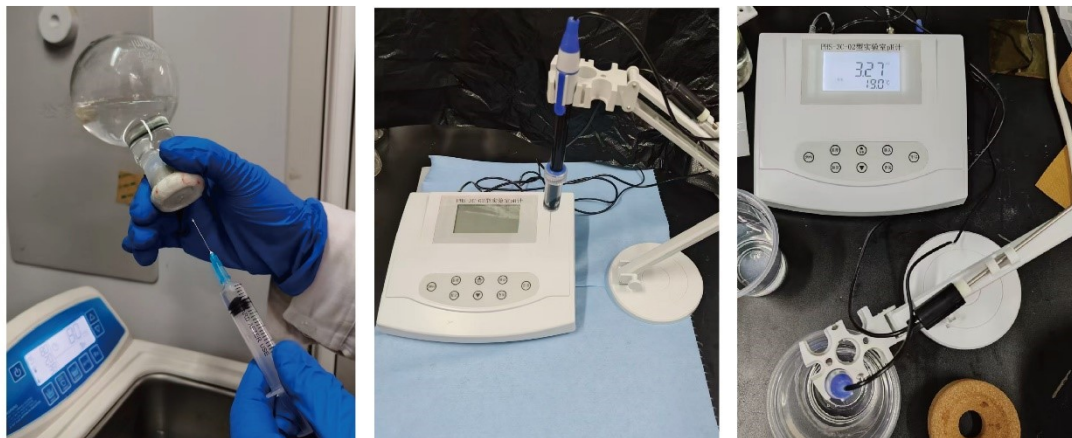

**Figure S11.** The pH of the liquid was measured after 2 h of ultrasonic contact catalysis.

## Supporting Tables

**Table S1.** Comparison of the present work with recent advances in electrocatalytic CO<sub>2</sub> reduction.<sup>1-6</sup>

| <b>Reactants</b> | <b>Products</b>               | <b>Productivity</b>                              | <b>Selectivity</b> | <b>Authors</b>                   |
|------------------|-------------------------------|--------------------------------------------------|--------------------|----------------------------------|
| CO <sub>2</sub>  | Amorphous carbon              | 11.4wt%                                          | /                  | <b>Luo et al.<sup>1</sup></b>    |
| CO <sub>2</sub>  | CO                            | 0.02244 μmol/h                                   | 96.24%             | <b>Wang et al.<sup>2</sup></b>   |
| CO <sub>2</sub>  | C <sub>2</sub> H <sub>4</sub> | 4.7 μmol/m <sup>3</sup>                          | /                  | <b>Wang et al.<sup>3</sup></b>   |
| CO <sub>2</sub>  | CH <sub>3</sub> OH            | 59.4 nmol/h                                      | 97%                | <b>Wang et al.<sup>4</sup></b>   |
| CO <sub>2</sub>  | CH <sub>3</sub> OH            | 13 nmol/h                                        | >90%               | <b>Wang et al.<sup>5</sup></b>   |
| CO <sub>2</sub>  | H <sub>2</sub> +CO            | 11.82 μmol/h(H <sub>2</sub> )<br>9.59 μmol/h(CO) | 55%                | <b>Nguyen et al.<sup>6</sup></b> |
| CO <sub>2</sub>  | CH <sub>3</sub> OH            | 68.4 μmol/h                                      | 93.6%              | <b>This work</b>                 |

## Supporting References

1. Luo, H.; Gao, S.; Yang, H.; Wang, G.; Shen, J.; Liu, Q.; Liu, J.; Li, Q.; Duan, L.; Yang, P., Contact-Electrocatalytic CO<sub>2</sub> Reduction via Solid–Liquid–Gas Interfaces Involving Liquid Metals. *ACS Sustainable Chemistry & Engineering* **2026**.
2. Wang, N.; Jiang, W.; Yang, J.; Feng, H.; Zheng, Y.; Wang, S.; Li, B.; Zhi, J.; Chung, W.; Ru, H., Contact-electro-catalytic CO<sub>2</sub> reduction from ambient air. *Nature Communications* **2024**, *15*.
3. Wang, N.; Jiang, W.; Feng, H.; Yang, J.; Li, B.; Yu, T.; Du, C.; Wang, J.; Zhi, J.; Hong, J., Target High-Efficient Ethylene Production from Dilute CO<sub>2</sub> Enabled by Sustainable Contact Electrons. *Small* **2025**, *21*.
4. Wang, N.; Feng, H.; Yang, J.; Hong, J.; Ye, E.; Jiang, W.; Zhang, Y.-W.; Wang, Z.; Jun, X.; Li, Z., Boosted contact-electro-catalytic CO<sub>2</sub> to methanol enabled by a built-in electric field design. *Nano Energy* **2026**, *152*, 111883.
5. Wang, N.; Feng, H.; Yang, J.; Zheng, J.; Zhang, Y. W.; Hadjichristidis, N.; Li, Z., In Situ High Selectivity Contact-Electroreduction of CO<sub>2</sub> to Methanol Using an Imine-Mediated Metal-Free Vitriimer Catalyst. *Angewandte Chemie International Edition* **2025**, *64*.
6. Nguyen, H. P.; Nguyen, N.; Tran, D.; Duong, T. H.; Nguyen, T. T.; Bowen, C. R.; Li, Z. H.; Arafa, M.; Dunn, S.; Pham, T. T., Highly Efficient Sono-Contact-Electrocatalysis Enabled by Fine-Scale and Ultrasonically Generated Polytetrafluoroethylene Particles. *Advanced Energy and Sustainability Research* **2026**, *7*
